# Supplementary material for: Biocompatible Self-Assembled Hydrogen-Bonded Gels Based on Natural Deep Eutectic Solvents and Hydroxypropyl Cellulose with Strong Antimicrobial Activity
Source: MDPI journal article supplement (doi:10.3390/gels8100666), 2022-10-17
Supplement: s1 [file s1]

**Biocompatible self-assembled hydrogen-bonded gels based on natural deep eutectic solvents and hydroxypropyl cellulose with strong antimicrobial activity**

Daniela Filip<sup>1\*</sup>, Doina Macocinschi<sup>1</sup>, Mihaela Balan-Porcarasu<sup>2\*</sup>, Cristian-Dragos Varganici<sup>3</sup>, Raluca-Petronela Dumitriu<sup>1</sup>, Dragos Peptanariu<sup>3</sup>, Cristina Gabriela Tuchilus<sup>4</sup>, Mirela-Fernanda Zaltariov<sup>5\*</sup>

<sup>1</sup>*Laboratory of Physical Chemistry of Polymers, “Petru Poni” Institute of Macromolecular Chemistry, Aleea Gr. Ghica Voda 41 A, Iasi, 700487, Romania;*

<sup>2</sup>*Laboratory of Polycondensation and Thermostable Polymers, “Petru Poni” Institute of Macromolecular Chemistry, Aleea Gr. Ghica Voda 41 A, Iasi, 700487, Romania;*

<sup>3</sup>*Centre of Advanced Research in Bionanoconjugates and Biopolymers, “Petru Poni” Institute of Macromolecular Chemistry, Aleea Gr. Ghica Voda 41 A, Iasi, 700487, Romania;*

<sup>4</sup>*“Gr. T. Popa” University of Medicine and Pharmacy, Faculty of Medicine, Microbiology Department, 16 Universitatii Street, 700115, Iasi, Romania*

<sup>5</sup>*Department of Inorganic Polymers, “Petru Poni” Institute of Macromolecular Chemistry, Aleea Gr. Ghica Voda 41 A, Iasi, 700487, Romania;*

*Corresponding authors: Mihaela Balan-Porcarasu, e-mail: [mihaela.balan@icmpp.ro](mailto:mihaela.balan@icmpp.ro); Mirela-Fernanda Zaltariov, e-mail: [zaltariov.mirela@icmpp.ro](mailto:zaltariov.mirela@icmpp.ro)*

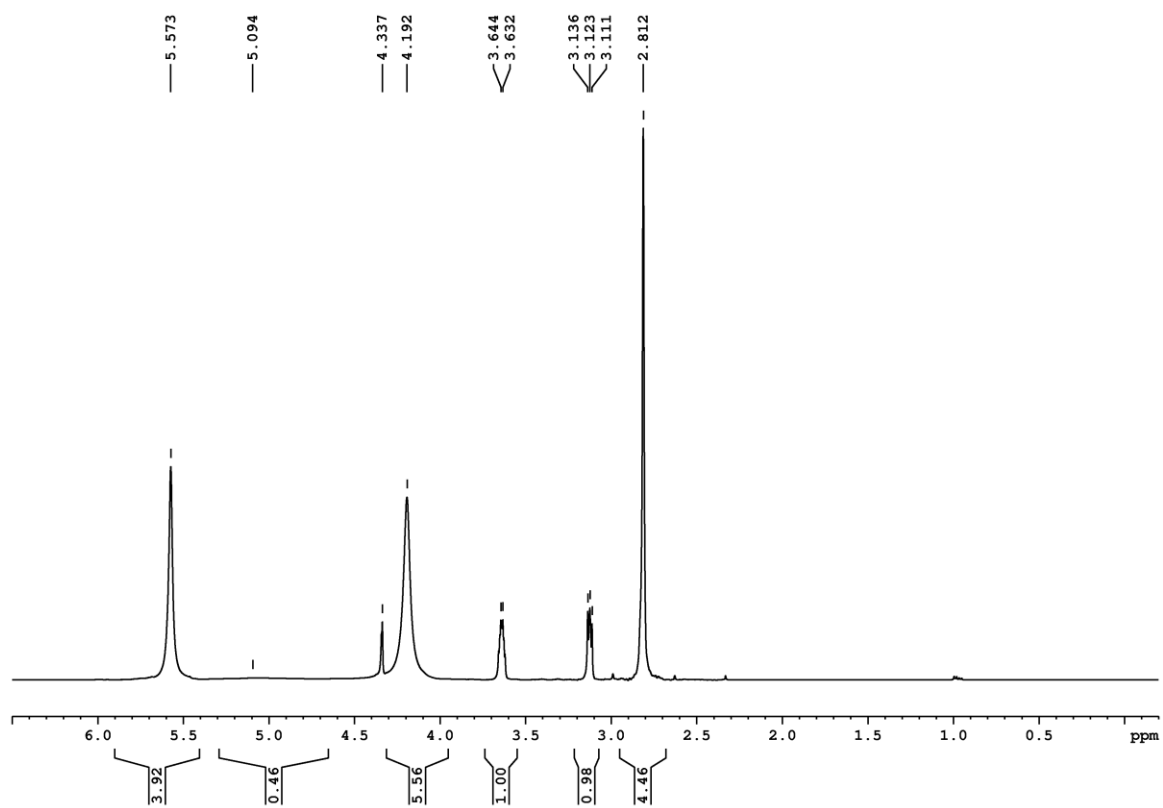

**Figure S1.**  $^1\text{H}$  NMR spectrum of ChCl-U-H<sub>2</sub>O (1:2:6).

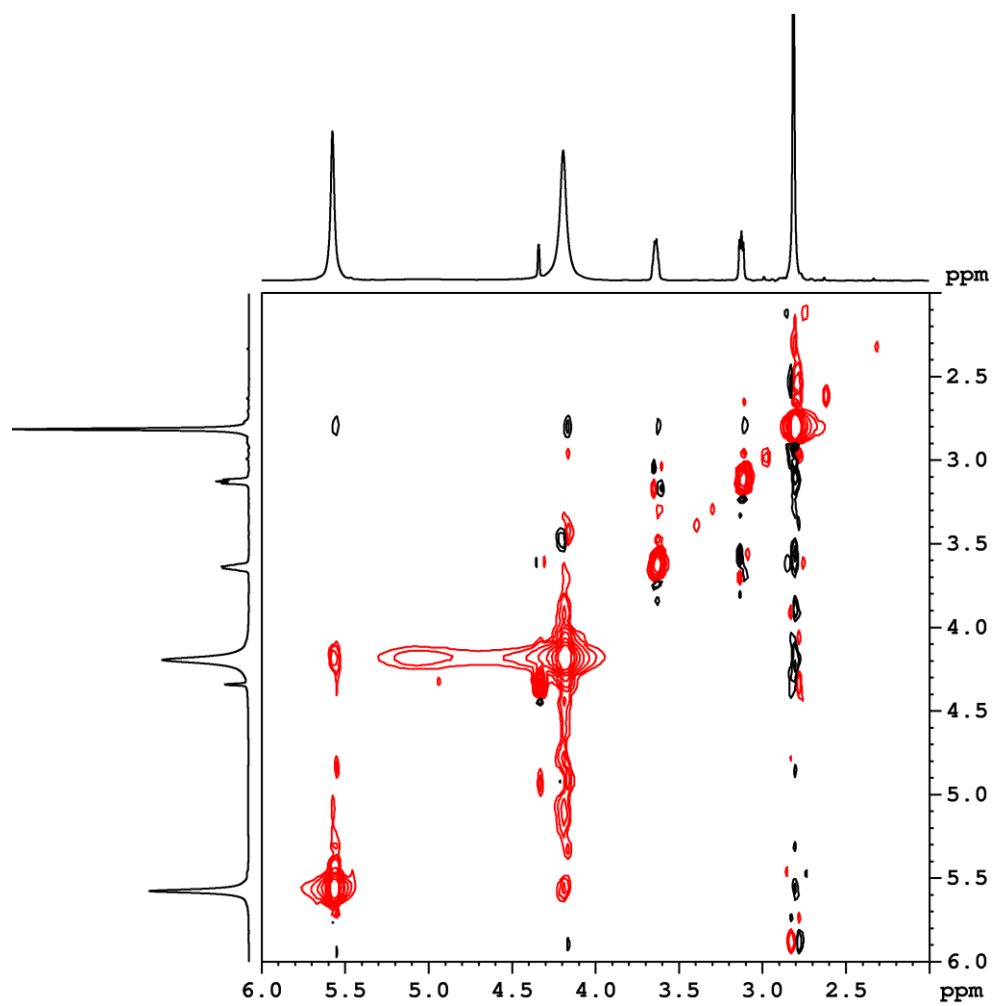

**Figure S2.** 2D ROESY spectrum of ChCl-U-H<sub>2</sub>O (1:2:6 molar ratio).

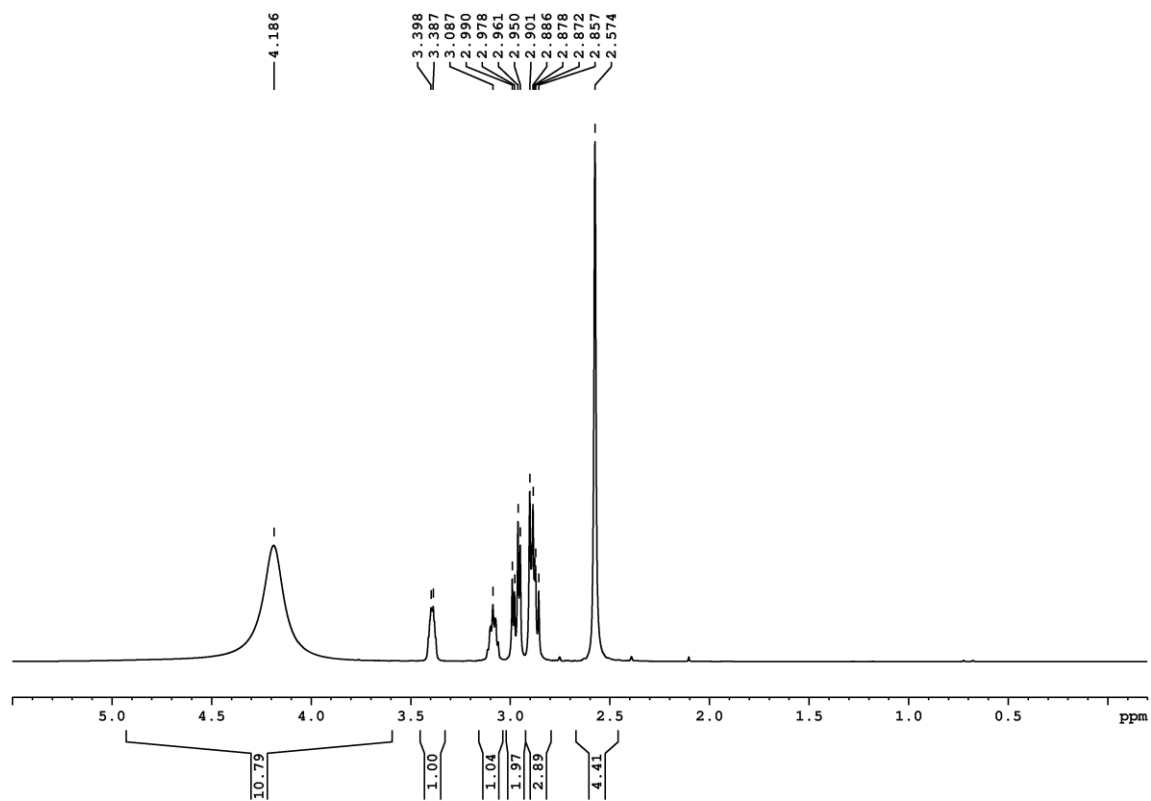

**Figure S3.**  $^1\text{H}$  NMR spectrum of ChCl-Gly- $\text{H}_2\text{O}$  (1:2:11).

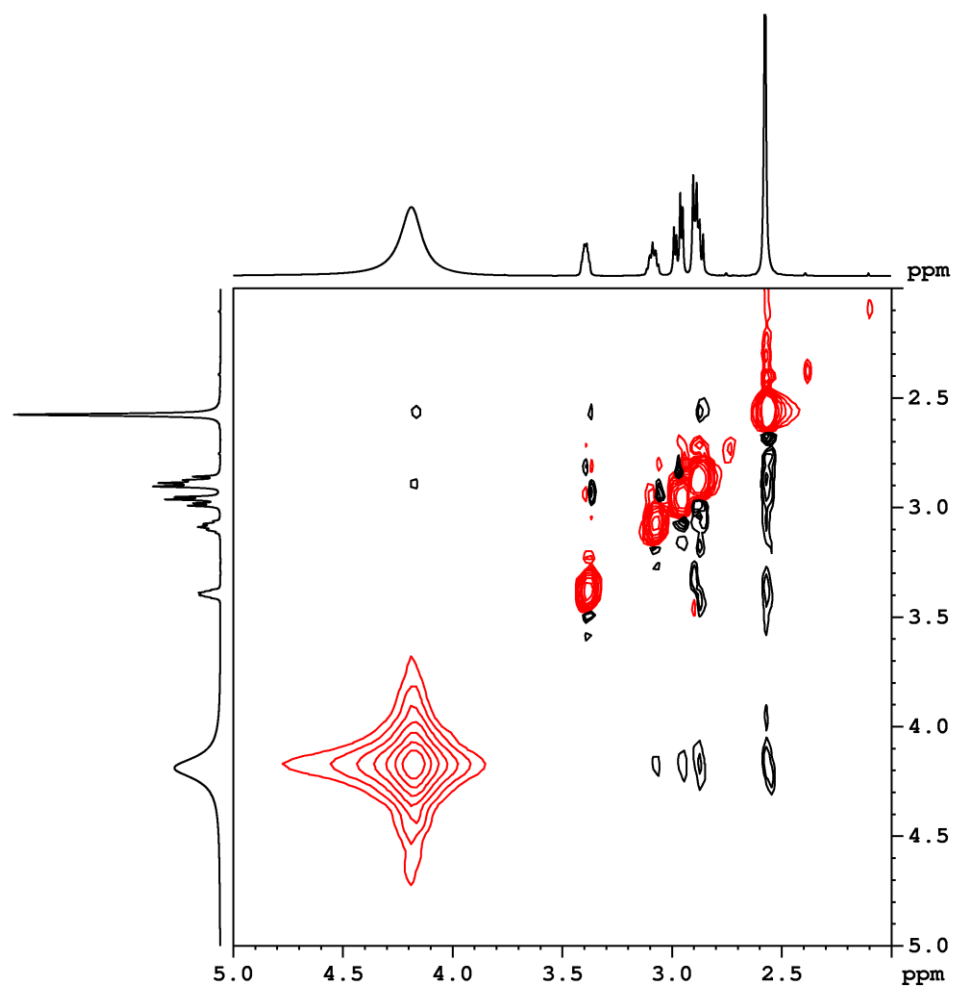

**Figure S4.** 2D ROESY spectrum of ChCl-Gly-H<sub>2</sub>O (1:2:11 molar ratio).

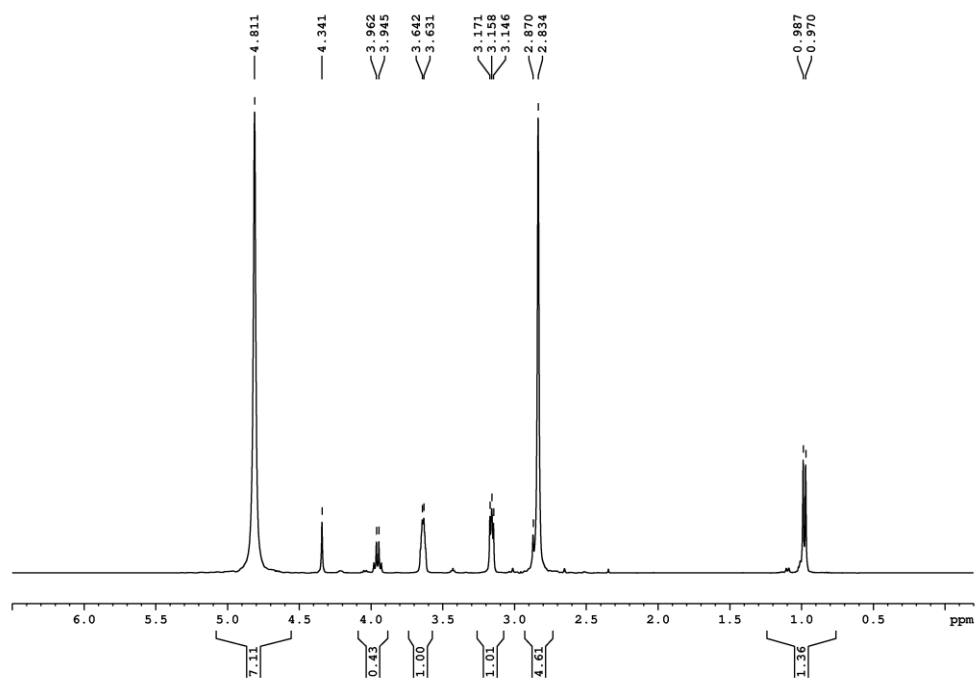

**Figure S5.**  $^1\text{H}$  NMR spectrum of ChCl-LA-H<sub>2</sub>O (1:1:7).

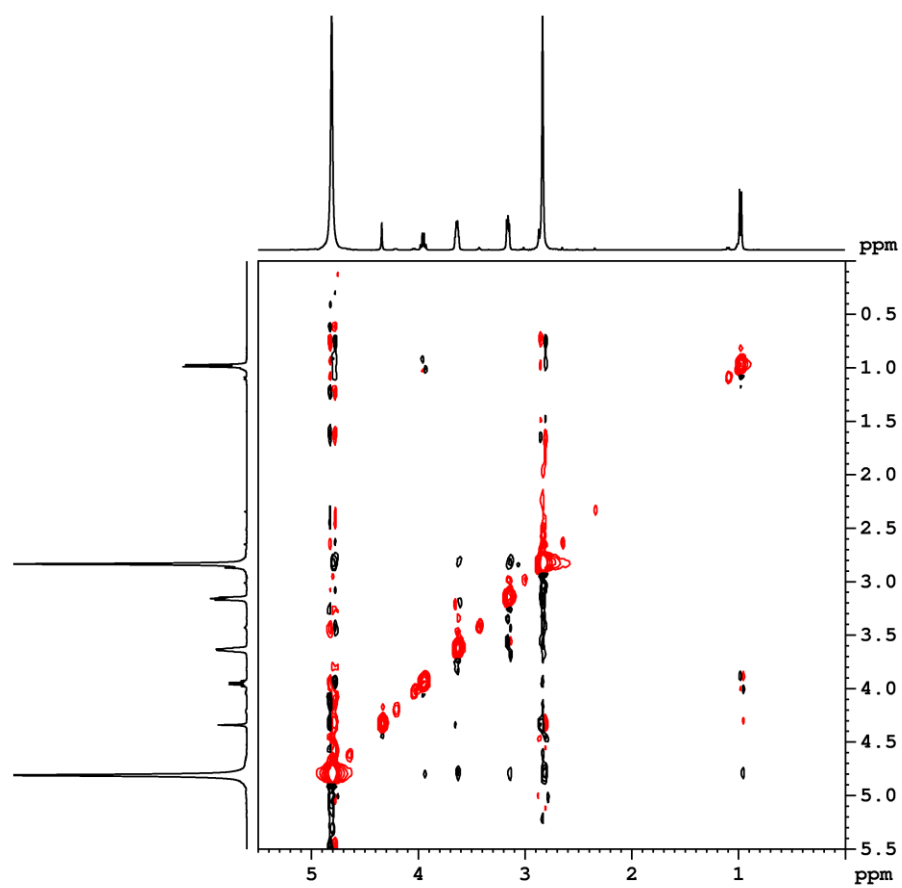

**Figure S6.** 2D ROESY spectrum of ChCl-LA-H<sub>2</sub>O (1:1:7 molar ratio).

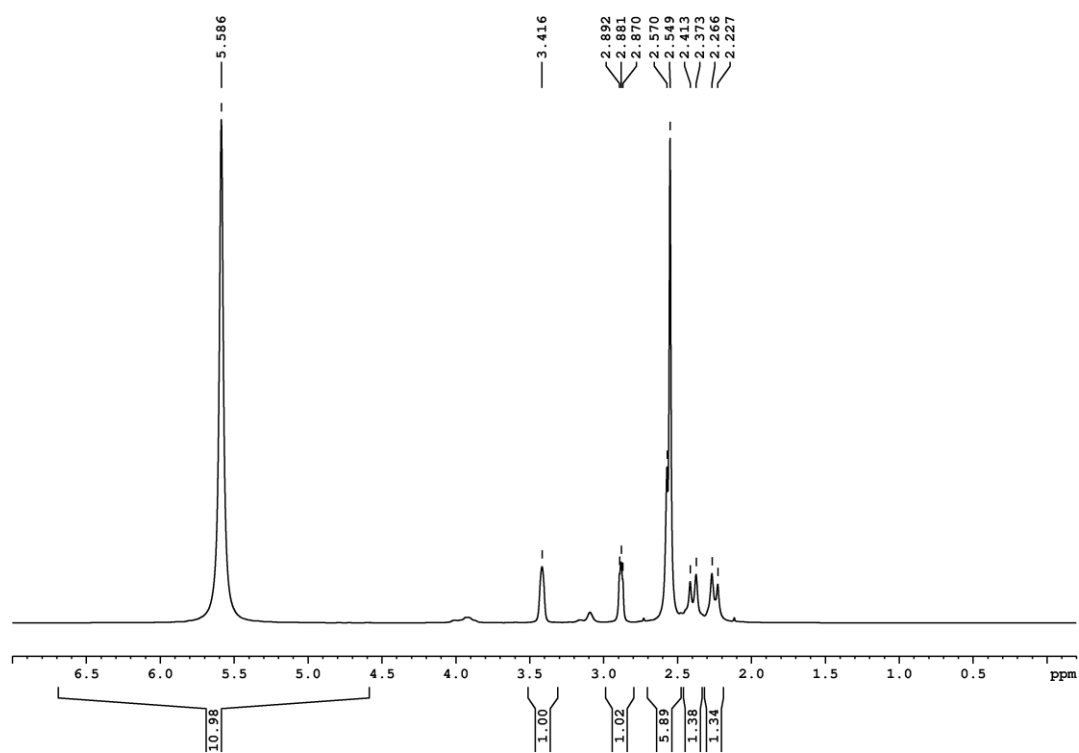

**Figure S7.** <sup>1</sup>H NMR spectrum of ChCl-CA-H<sub>2</sub>O (1:1:10).



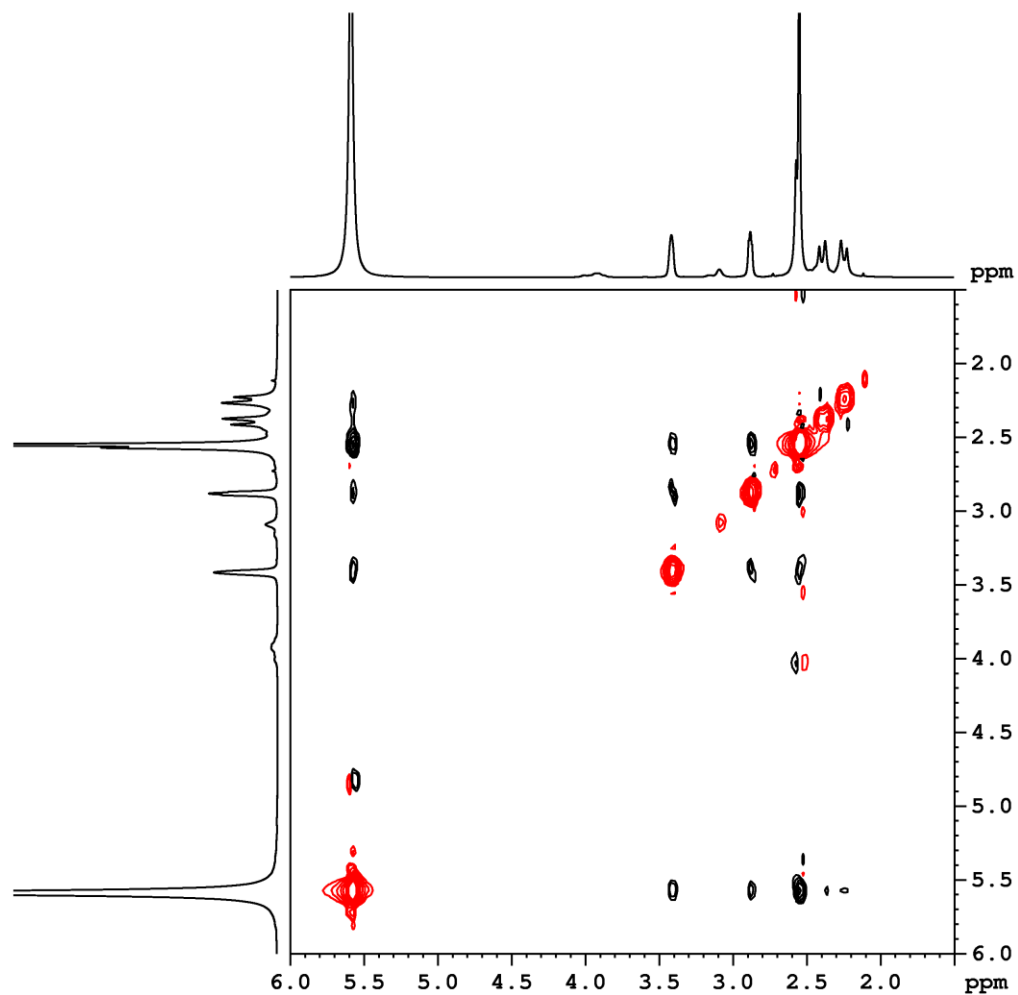

**Figure S8.** 2D ROESY spectrum of ChCl-CA-H<sub>2</sub>O (1:1:10 molar ratio).

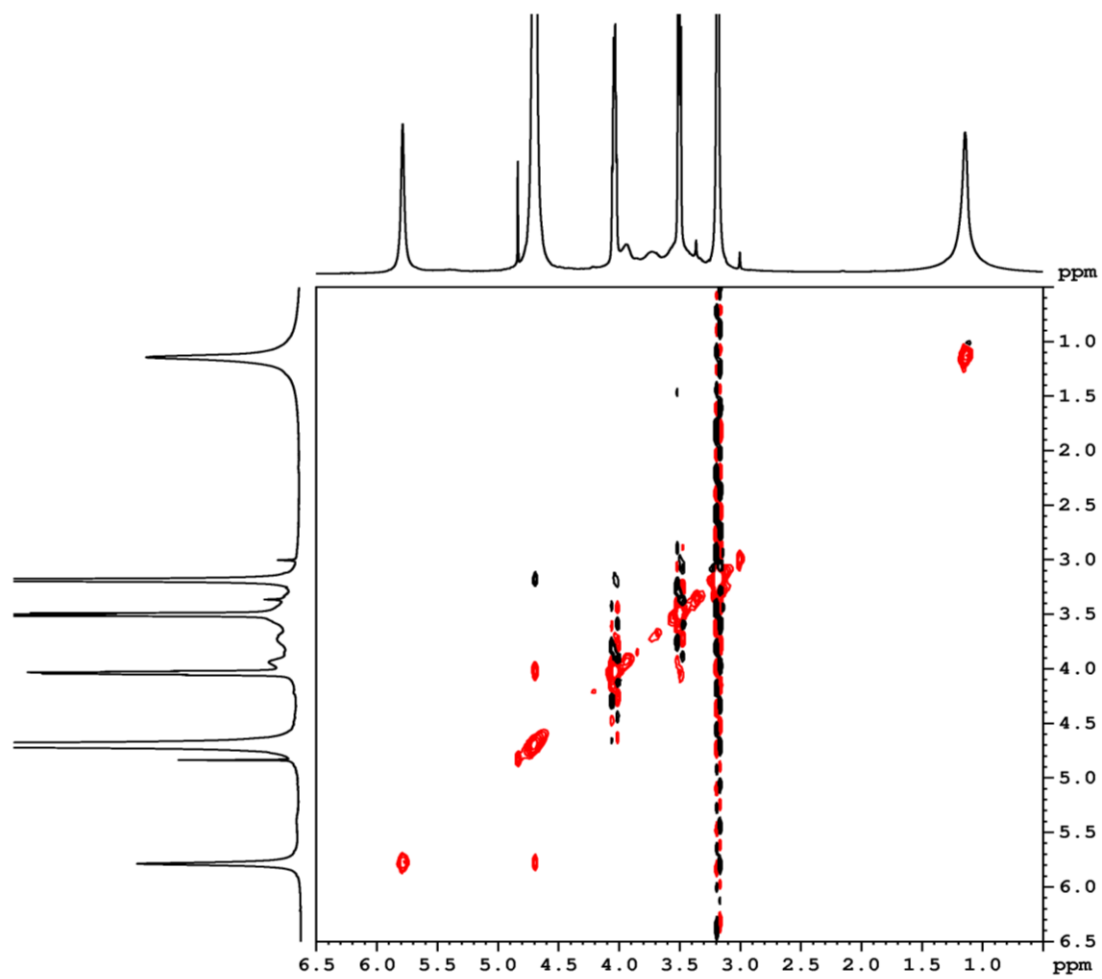

**Figure S9.** 2D ROESY spectrum of HPC-ChCl-U 17%
